# Supplementary material for: Preparation of silica nanoparticle based polymer composites via mussel inspired chemistry and their enhanced adsorption capability towards methylene blue
Source: Royal Society of Chemistry journal article supplement (doi:10.1039/c6ra16467f), 2016-01-01
Supplement: c6ra16467f1.pdf [file c6ra16467f1.pdf]

Preparation of silica nanoparticles based polymer composites via mussel inspired chemistry and their enhanced adsorption capability towards methylene blue

Qiang Huang<sup>a,#</sup>, Leichun Liu<sup>a,#</sup>, Guangjian Zeng<sup>a</sup>, Meiying Liu<sup>a</sup>, Liucheng Mao<sup>a</sup>, Hongye Huang<sup>a</sup>, Fengjie Deng<sup>a,\*</sup>, Xiaoyong Zhang<sup>a,\*</sup>, Yen Wei<sup>b,\*</sup>

a Department of Chemistry, Nanchang University, 999 Xuefu Avenue, Nanchang 330031, China

b Department of Chemistry and the Tsinghua Center for Frontier Polymer Research, Tsinghua University, Beijing, 100084, P. R. China.

# These authors contributed equally to this work

### 1.1 The adsorption of MB by SiO<sub>2</sub>@poly(SVS-co-ITA-DA)

The adsorption performance of SiO<sub>2</sub>@poly(SVS-co-ITA-DA)nanocompositestowards MB was studied in aqueous solution. The batch adsorption experiments were carried out with 50 mL sample tubes. MBandSiO<sub>2</sub>@poly(SVS-co-ITA-DA)nanocomposites were mixed in a sample tubes. The Kinetic experiment were completed by the constant initial concentration (50mgL<sup>-1</sup>) of MB and 10 mg adsorbents to study the adsorption equilibration time at room temperature and the pH of 7.0. The adsorption thermodynamics batch experiment were studied by 5 °C gradient increase of temperature from room temperature 30 to 60 °C (303,308,313,318,323,328 and 333K) while the other conditions (concentration, pH, contact time) remained unchanged. The study of adsorption isotherm was conducted by adding the same amount of adsorbent into the 40 mL MB aqueous solution with different initial concentrations range from 5 to 500 mgL<sup>-1</sup> at room temperature and pH 7.0. The influence of pH to the adsorption capacity of SiO<sub>2</sub>@poly(SVS-co-ITA-DA) for MB was performed by adding 10 mg adsorbents into 40 mL MB with different pH value (2 to 10). The initial pH value of the adsorption solution was adjusted to a certain value by using 0.1molL<sup>-1</sup> NaOH and0.1molL<sup>-1</sup> HCl.

The concentrations of MB remained in the aqueous solution was determined using UV-vis spectrophotometer.

The equilibrium adsorption capacity ( $Q_e$ , mg/g) of the adsorbent to the MB aqueous solution was calculated by the following equation:

$$Q_e = \frac{C_0 - C_e}{m} \times V$$

Where  $Q_e$  (mg/g) is the amount of adsorbed MB per gram dry weight of the adsorbent atadsorption equilibrium time,  $C_0$  (mg/L) is the initial concentration of MB aqueous solution and  $C_e$  (mg/L) is the equilibrium concentration of MB,  $m$  (g) is the adsorbent's does in the adsorption medium and  $V$  (mL) is the dye MB aqueous solution's volume.

The adsorption capacity at any time  $Q_t$  (mg/g) of the adsorbents to the MB aqueous solution was calculated by the following equation:

$$Q_t = \frac{C_0 - C_t}{m} \times V$$

Where  $Q_t$  (mg/g) is the amount of MB adsorbed per gram dry weight of the adsorbent at the time  $t$  (min),  $C_0$  (mg/L) is the initial concentration of MB aqueous solution and  $C_t$  (mg/L) is the concentration of MB at time  $t$  (min),  $m$  (g) is the adsorbent's dose in the adsorption medium and  $V$  (L) is the dye MB aqueous solution's volume.

The removal efficiency (R%) of the MB were calculated by the following equation:

$$R = \frac{100(C_0 - C_t)}{C_0}$$

Where R (%) is the removal efficiency of MB. The  $C_t$  (mg/L), and  $C_0$  (mg/L) is introduced as the above equation.

## 2. Results

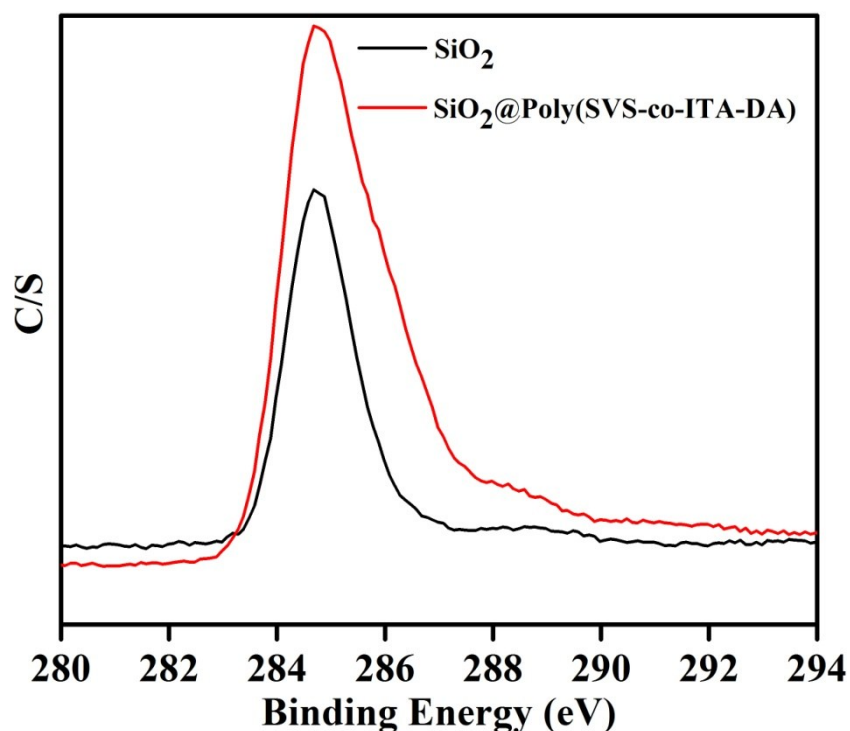

**Fig. S1** The detailed XPS Spectra (C1s) of SiO<sub>2</sub> NPs and SiO<sub>2</sub>@poly(SVS-co-ITA-DA) nanocomposites.

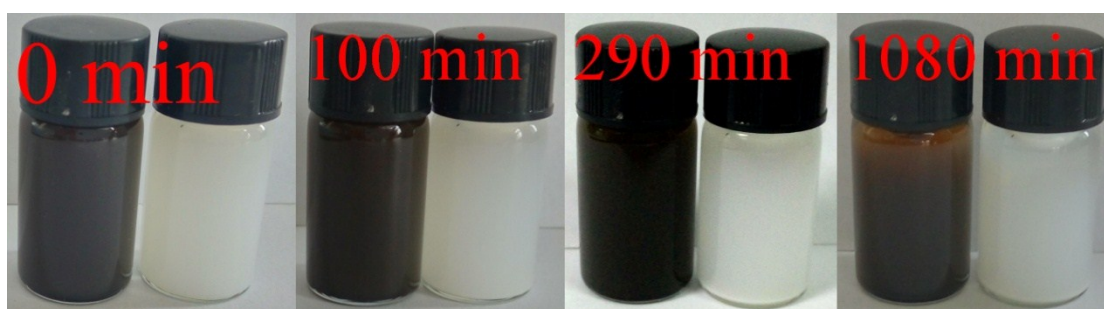

**Fig. S2** The water dispersibility of modified (Left bottle) and unmodified silica nanoparticles (right bottle) at different deposition time points.

**Table S1** Element contents (%) of silica nanoparticles based on XPS analysis.

| Sample                                | Atom percentage (%) |      |       |               |
|---------------------------------------|---------------------|------|-------|---------------|
|                                       | C1s                 | N1s  | O1s   | Si2p<br>S2p   |
| SiO <sub>2</sub> NPs                  | 17.65               | 0    | 56.2  | 26.15<br>0    |
| SiO <sub>2</sub> @poly(SVS-co-ITA-DA) | 37.07               | 3.37 | 42.84 | 15.98<br>0.73 |

**Table S2** Data of Pseudo-first-order, Pseudo-second-order and Intraparticle diffusion models parameters at 303K

| Models                       | Parameters                                      | Initial concentration (mg/L) |
|------------------------------|-------------------------------------------------|------------------------------|
|                              |                                                 | 50                           |
| Pseudo-first-order equation  | $Q_e (cal)$ (mg/g)                              | 61.586                       |
|                              | $k_1$ (min <sup>-1</sup> )                      | 0.0681                       |
|                              | $R^2$                                           | 0.991                        |
| Pseudo-second-order equation | $Q_e (cal)$ (m <sup>2</sup> g <sup>-1</sup> )   | 69.1                         |
|                              | $k_2$ (g mg <sup>-1</sup> min <sup>-1</sup> )   | 0.00128                      |
|                              | $h$ (mg g <sup>-1</sup> min <sup>-1</sup> )     | 6.099                        |
|                              | $R^2$                                           | 0.988                        |
| Intraparticle diffusion      | $k_p$ (mg g <sup>-1</sup> min <sup>-0.5</sup> ) | 17651.16                     |
|                              | $C$                                             | 7.076                        |
|                              | $R^2$                                           | 0.895                        |

**Table S3** Data of the thermodynamic parameters for the adsorption of MB by SiO<sub>2</sub>@poly(SVS-co-ITA-DA)

| <i>T</i> (K) | $\Delta G^0$ (kJ/mol) | $\Delta H^0$ (kJ/mol) | $\Delta S^0$ (kJ/mol K) |
|--------------|-----------------------|-----------------------|-------------------------|
| 308.15       | -2.244                | 13.37                 | 0.05066                 |
| 313.15       | -2.497                |                       |                         |
| 318.15       | -2.750                |                       |                         |
| 323.15       | -3.003                |                       |                         |
| 328.15       | -3.257                |                       |                         |
| 333.15       | -3.510                |                       |                         |

120 min.

**Table S4** Data of adsorption isotherm of Langmuir and Freundlich models for the adsorption on SiO<sub>2</sub>@poly(SVS-co-ITA-DA) for MB at 303 K.

| Isotherms  | Parameters                           | Temperatures(K) |
|------------|--------------------------------------|-----------------|
|            |                                      | 303             |
| Langmuir   | $Q_m$ (mg/g)                         | 75.76           |
|            | $K_L$ (L/mg)                         | 0.2326          |
|            | $R_L$                                | 0.02327-0.8269  |
|            | $R^2$                                | 0.9906          |
| Freundlich | $K_F$ [(mg/g)(L/mg) <sup>1/n</sup> ] | 26.21           |
|            | $n$                                  | 4.456           |
|            | $R^2$                                | 0.8896          |

**Table S5** Comparison of adsorption capacity  $q_m$ (mg•g<sup>-1</sup>) of MB on various materials.

| <b>Materials</b>                      | <b>Maximum adsorption capacity <math>q_m</math> (mg • g<sup>-1</sup>)</b> | <b>References</b> |
|---------------------------------------|---------------------------------------------------------------------------|-------------------|
| Persian Kaolin                        | 20.40                                                                     | [1]               |
| Naturalmontmorillonite                | 78.20                                                                     | [2]               |
| Natural zeolite                       | 14.40                                                                     | [3]               |
| Zeolite MCM-22                        | 57.60                                                                     | [3]               |
| chitosan/graphene oxide               | 130.10                                                                    | [4]               |
| mesoporous SBA-15                     | 49.28                                                                     | [5]               |
| SiO <sub>2</sub> @poly(SVS-co-ITA-DA) | 62.20                                                                     | This work         |

### References

- [1] TEHRANI-BAGHA A, NIKKAR H, MAHMOODI N, et al. The sorption of cationic dyes onto kaolin: Kinetic, isotherm and thermodynamic studies [J]. Desalination, 2011, 266(1): 274-280.
- [2] BODENHEIMER W, HELLER L. Sorption of methylene blue by montmorillonite saturated with different cations [J]. Israel J Chem, 1968, 6(3): 307-314.
- [3] WANG S, LI H, XU L. Application of zeolite MCM-22 for basic dye removal from wastewater [J]. J Colloid Interf Sci, 2006, 295(1): 71-78.
- [4] FAN L, LUO C, SUN M, et al. Preparation of novel magnetic chitosan/graphene oxide composite as effective adsorbents toward methylene blue [J]. Bioresource techn, 2012, 114(703-706).
- [5] HUANG C-H, CHANG K-P, OU H-D, et al. Adsorption of cationic dyes onto mesoporous silica [J]. Micropor Mesopor Mat, 2011, 141(1): 102-109.
